# Supplementary material for: Degenerate and non-degenerate two-photon absorption of coumarin dyes
Source: Royal Society of Chemistry journal article supplement (doi:10.1039/d3cp00723e), 2023-01-01
Supplement: d3cp00723e2.pdf [file d3cp00723e2.pdf]

# Supplementary Information for “Degenerate and Non-Degenerate Two-Photon Absorption of Coumarin Dyes”

Ismael A. Elayan and Alex Brown\*

*Department of Chemistry, University of Alberta, Edmonton, Alberta, Canada, T6G 2G2*

E-mail: alex.brown@ualberta.ca

## Contents

### List of Figures

- S1 D-2PA and ND-2PA scan of coumarin 6 at the CAM-B3LYP/aug-cc-pVDZ level of theory in DMSO. . . . . 4

### List of Tables

- S1 The magnitudes of the transition dipole moments ( $\mu_{01}$  in a.u.) for the excitation from  $S_0$  to  $S_1$  in MeOH, ClForm, and DMSO at the CAM-B3LYP/aug-cc-pVDZ level of theory. . . . . 4

|    |                                                                                                                                                                                                                                        |   |
|----|----------------------------------------------------------------------------------------------------------------------------------------------------------------------------------------------------------------------------------------|---|
| S2 | Excitation energies ( $\omega$ (eV)) and 2PA cross-sections ( $\sigma^{2PA}$ (GM)) for the transitions to $S_1$ for D-2PA and ND-2PA of <b>coumarin</b> calculated in CPCM at the CAM-B3LYP/aug-cc-pVDZ level of theory. . . . .       | 4 |
| S3 | Excitation energies ( $\omega$ (eV)) and 2PA cross-sections ( $\sigma^{2PA}$ (GM)) for the transitions to $S_1$ for D-2PA and ND-2PA of <b>coumarin 6</b> calculated in CPCM at the CAM-B3LYP/aug-cc-pVDZ level of theory. . . . .     | 5 |
| S4 | Excitation energies ( $\Delta E$ (eV)) and 2PA cross-sections ( $\sigma^{2PA}$ (GM)) for the transitions to $S_1$ for D-2PA and ND-2PA of <b>coumarin 120</b> calculated in CPCM at the CAM-B3LYP/aug-cc-pVDZ level of theory. . . . . | 5 |
| S5 | Excitation energies ( $\omega$ (eV)) and 2PA cross-sections ( $\sigma^{2PA}$ (GM)) for the transitions to $S_1$ for D-2PA and ND-2PA of <b>coumarin 307</b> calculated in CPCM at the CAM-B3LYP/aug-cc-pVDZ level of theory. . . . .   | 5 |
| S6 | Excitation energies ( $\omega$ (eV)) and 2PA cross-sections ( $\sigma^{2PA}$ (GM)) for the transitions to $S_1$ for D-2PA and ND-2PA of <b>coumarin 343</b> calculated in CPCM at the CAM-B3LYP/aug-cc-pVDZ level of theory. . . . .   | 6 |
| S7 | Excitation energies ( $\Delta E$ (eV)) and D-2PA cross-sections ( $\sigma^{D-2PA}$ (GM)) for the transitions to $S_1$ , $S_2$ , and $S_3$ in CPCM at the CAM-B3LYP/aug-cc-pVDZ level of theory. . . . .                                | 6 |
| S8 | Two-photon absorption transition moments, $\delta_{\omega}^{2PA}$ (in a.u.), calculated using quadratic response theory at different $\omega$ values at the CAM-B3LYP/aug-cc-pVDZ level of theory in MeOH. . . . .                     | 7 |
| S9 | Two-photon absorption transition moments, $\delta_{\omega}^{2PA}$ (in a.u.), calculated using quadratic response theory at different $\omega$ values at the CAM-B3LYP/aug-cc-pVDZ level of theory in ClForm. . . . .                   | 8 |

|     |                                                                                                                                                                                                                                                                                                                         |    |
|-----|-------------------------------------------------------------------------------------------------------------------------------------------------------------------------------------------------------------------------------------------------------------------------------------------------------------------------|----|
| S10 | Two-photon absorption transition moments, $\delta_{\omega}^{2PA}$ (in a.u.), and $\theta$ ( $^{\circ}$ ) calculated using quadratic response theory at different $\omega$ values at the CAM-B3LYP/aug-cc-pVDZ level of theory in DMSO. . . . .                                                                          | 9  |
| S11 | ND-2PA cross-sections of the 2-state model ( $\sigma_{\omega}^{ND-2SM}$ ), ratio of non-degenerate to degenerate photon energies (Enh.) and ND-2PA cross-sections ( $\sigma_{\omega}^{ND-2PA}$ ) computed using quadratic response of <b>coumarin</b> at the CAM-B3LYP/aug-cc-pVDZ level of theory in DMSO. . . . .     | 10 |
| S12 | ND-2PA cross-sections of the 2-state model ( $\sigma_{\omega}^{ND-2SM}$ ), ratio of non-degenerate to degenerate photon energies (Enh.) and ND-2PA cross-sections ( $\sigma_{\omega}^{ND-2PA}$ ) computed using quadratic response of <b>coumarin 120</b> at the CAM-B3LYP/aug-cc-pVDZ level of theory in DMSO. . . . . | 11 |
| S13 | ND-2PA cross-sections of the 2-state model ( $\sigma_{\omega}^{ND-2SM}$ ), ratio of non-degenerate to degenerate photon energies (Enh.) and ND-2PA cross-sections ( $\sigma_{\omega}^{ND-2PA}$ ) computed using quadratic response of <b>coumarin 307</b> at the CAM-B3LYP/aug-cc-pVDZ level of theory in DMSO. . . . . | 12 |
| S14 | ND-2PA cross-sections of the 2-state model ( $\sigma_{\omega}^{ND-2SM}$ ), ratio of non-degenerate to degenerate photon energies (Enh.) and ND-2PA cross-sections ( $\sigma_{\omega}^{ND-2PA}$ ) computed using quadratic response of <b>coumarin 343</b> at the CAM-B3LYP/aug-cc-pVDZ level of theory in DMSO. . . . . | 13 |

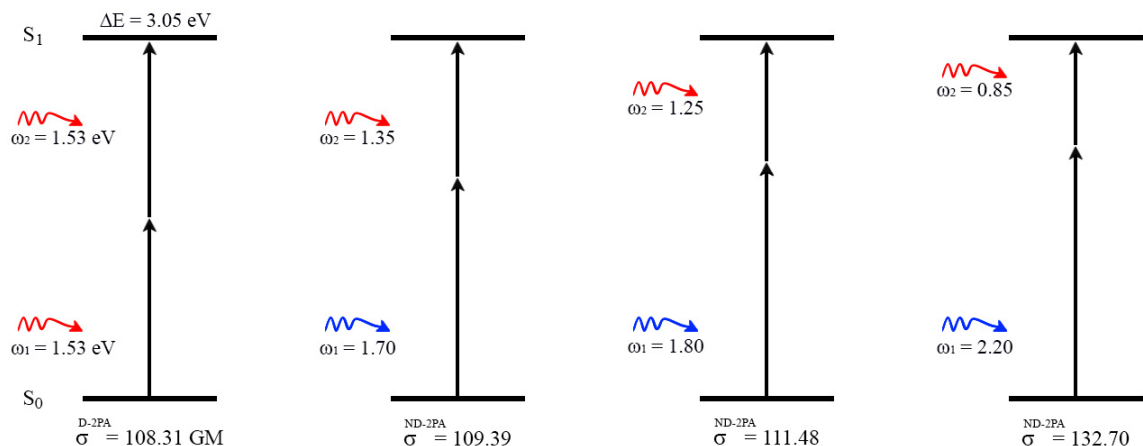

Figure S1: D-2PA and ND-2PA scan of coumarin 6 at the CAM-B3LYP/aug-cc-pVDZ level of theory in DMSO.

Table S1: The magnitudes of the transition dipole moments ( $\mu_{01}$  in a.u.) for the excitation from  $S_0$  to  $S_1$  in MeOH, ClForm, and DMSO at the CAM-B3LYP/aug-cc-pVDZ level of theory.

| Dye          | MeOH | ClForm | DMSO |
|--------------|------|--------|------|
| Coumarin     | 1.98 | 1.97   | 2.21 |
| Coumarin 6   | 4.47 | 4.46   | 4.67 |
| Coumarin 120 | 2.65 | 2.64   | 2.86 |
| Coumarin 307 | 2.86 | 2.84   | 3.07 |
| Coumarin 343 | 3.71 | 3.65   | 3.98 |

Table S2: Excitation energies ( $\omega$  (eV)) and 2PA cross-sections ( $\sigma^{2PA}$  (GM)) for the transitions to  $S_1$  for D-2PA and ND-2PA of **coumarin** calculated in CPCM at the CAM-B3LYP/aug-cc-pVDZ level of theory.

| Solvent | D-2PA    |                    |                |                             | ND-2PA                      |                             |                             |                             |                             |                             |                             |                             |
|---------|----------|--------------------|----------------|-----------------------------|-----------------------------|-----------------------------|-----------------------------|-----------------------------|-----------------------------|-----------------------------|-----------------------------|-----------------------------|
|         | $\omega$ | $\frac{\omega}{2}$ | $\sigma^{2PA}$ | $\sigma_{\omega=2.5}^{2PA}$ | $\sigma_{\omega=2.6}^{2PA}$ | $\sigma_{\omega=2.7}^{2PA}$ | $\sigma_{\omega=2.8}^{2PA}$ | $\sigma_{\omega=2.9}^{2PA}$ | $\sigma_{\omega=3.0}^{2PA}$ | $\sigma_{\omega=3.1}^{2PA}$ | $\sigma_{\omega=3.2}^{2PA}$ | $\sigma_{\omega=3.3}^{2PA}$ |
| MeOH    | 4.35     | 2.18               | 2.42           | 2.49                        | 2.54                        | 2.61                        | 2.70                        | 2.80                        | 2.94                        | 3.10                        | 3.31                        | 3.56                        |
| ClForm  | 4.33     | 2.17               | 2.49           | 2.58                        | 2.63                        | 2.71                        | 2.80                        | 2.92                        | 3.06                        | 3.24                        | 3.46                        | 3.74                        |
| DMSO    | 4.33     | 2.17               | 2.98           | 3.08                        | 3.14                        | 3.23                        | 3.34                        | 3.48                        | 3.65                        | 3.87                        | 4.13                        | 4.45                        |

Table S3: Excitation energies ( $\omega$  (eV)) and 2PA cross-sections ( $\sigma^{2PA}$  (GM)) for the transitions to  $S_1$  for D-2PA and ND-2PA of **coumarin 6** calculated in CPCM at the CAM-B3LYP/aug-cc-pVDZ level of theory.

| Solvent | D-2PA    |                    |                | ND-2PA                      |                             |                             |                             |                             |                             |
|---------|----------|--------------------|----------------|-----------------------------|-----------------------------|-----------------------------|-----------------------------|-----------------------------|-----------------------------|
|         | $\omega$ | $\frac{\omega}{2}$ | $\sigma^{2PA}$ | $\sigma_{\omega=1.7}^{2PA}$ | $\sigma_{\omega=1.8}^{2PA}$ | $\sigma_{\omega=1.9}^{2PA}$ | $\sigma_{\omega=2.0}^{2PA}$ | $\sigma_{\omega=2.1}^{2PA}$ | $\sigma_{\omega=2.2}^{2PA}$ |
| MeOH    | 3.09     | 1.55               | 94.15          | 94.92                       | 96.38                       | 98.88                       | 102.45                      | 107.25                      | 113.67                      |
| ClForm  | 3.10     | 1.55               | 95.62          | 95.67                       | 96.43                       | 98.02                       | 100.50                      | 104.04                      | 108.81                      |
| DMSO    | 3.05     | 1.53               | 108.31         | 109.39                      | 111.48                      | 114.40                      | 118.81                      | 124.75                      | 132.70                      |

Table S4: Excitation energies ( $\Delta E$  (eV)) and 2PA cross-sections ( $\sigma^{2PA}$  (GM)) for the transitions to  $S_1$  for D-2PA and ND-2PA of **coumarin 120** calculated in CPCM at the CAM-B3LYP/aug-cc-pVDZ level of theory.

| Solvent | D-2PA      |                    |                | ND-2PA                      |                             |                             |                             |                             |                             |                             |
|---------|------------|--------------------|----------------|-----------------------------|-----------------------------|-----------------------------|-----------------------------|-----------------------------|-----------------------------|-----------------------------|
|         | $\Delta E$ | $\frac{\omega}{2}$ | $\sigma^{2PA}$ | $\sigma_{\omega=2.2}^{2PA}$ | $\sigma_{\omega=2.3}^{2PA}$ | $\sigma_{\omega=2.4}^{2PA}$ | $\sigma_{\omega=2.5}^{2PA}$ | $\sigma_{\omega=2.6}^{2PA}$ | $\sigma_{\omega=2.7}^{2PA}$ | $\sigma_{\omega=2.8}^{2PA}$ |
| MeOH    | 3.98       | 1.99               | 29.22          | 29.57                       | 30.01                       | 30.65                       | 31.50                       | 32.59                       | 33.97                       | 35.70                       |
| ClForm  | 4.00       | 2.00               | 30.55          | 30.84                       | 31.28                       | 31.93                       | 32.78                       | 33.89                       | 35.29                       | 37.04                       |
| DMSO    | 3.95       | 1.98               | 34.53          | 34.97                       | 35.55                       | 36.36                       | 37.44                       | 38.82                       | 40.57                       | 42.76                       |

Table S5: Excitation energies ( $\omega$  (eV)) and 2PA cross-sections ( $\sigma^{2PA}$  (GM)) for the transitions to  $S_1$  for D-2PA and ND-2PA of **coumarin 307** calculated in CPCM at the CAM-B3LYP/aug-cc-pVDZ level of theory.

| Solvent | D-2PA    |                    |                | ND-2PA                      |                             |                             |                             |                             |                             |                             |
|---------|----------|--------------------|----------------|-----------------------------|-----------------------------|-----------------------------|-----------------------------|-----------------------------|-----------------------------|-----------------------------|
|         | $\omega$ | $\frac{\omega}{2}$ | $\sigma^{2PA}$ | $\sigma_{\omega=1.9}^{2PA}$ | $\sigma_{\omega=2.0}^{2PA}$ | $\sigma_{\omega=2.1}^{2PA}$ | $\sigma_{\omega=2.2}^{2PA}$ | $\sigma_{\omega=2.3}^{2PA}$ | $\sigma_{\omega=2.4}^{2PA}$ | $\sigma_{\omega=2.5}^{2PA}$ |
| MeOH    | 3.49     | 1.75               | 64.93          | 65.52                       | 66.59                       | 68.22                       | 70.51                       | 73.56                       | 77.54                       | 82.68                       |
| ClForm  | 3.35     | 1.77               | 71.72          | 72.11                       | 73.14                       | 74.77                       | 77.09                       | 80.19                       | 84.24                       | 89.46                       |
| DMSO    | 3.46     | 1.73               | 75.55          | 76.47                       | 77.84                       | 79.91                       | 82.77                       | 86.57                       | 91.52                       | 97.93                       |

Table S6: Excitation energies ( $\omega$  (eV)) and 2PA cross-sections ( $\sigma^{2PA}$  (GM)) for the transitions to  $S_1$  for D-2PA and ND-2PA of **coumarin 343** calculated in CPCM at the CAM-B3LYP/aug-cc-pVDZ level of theory.

| Solvent | D-2PA    |                    |                | ND-2PA                      |                             |                             |                             |                             |                             |
|---------|----------|--------------------|----------------|-----------------------------|-----------------------------|-----------------------------|-----------------------------|-----------------------------|-----------------------------|
|         | $\omega$ | $\frac{\omega}{2}$ | $\sigma^{2PA}$ | $\sigma_{\omega=1.8}^{2PA}$ | $\sigma_{\omega=1.9}^{2PA}$ | $\sigma_{\omega=2.0}^{2PA}$ | $\sigma_{\omega=2.1}^{2PA}$ | $\sigma_{\omega=2.2}^{2PA}$ | $\sigma_{\omega=2.3}^{2PA}$ |
| MeOH    | 3.27     | 1.64               | 67.73          | 68.45                       | 69.53                       | 71.29                       | 73.74                       | 77.03                       | 81.34                       |
| ClForm  | 3.27     | 1.64               | 81.90          | 82.38                       | 83.72                       | 85.79                       | 88.67                       | 92.54                       | 97.62                       |
| DMSO    | 3.23     | 1.62               | 80.42          | 81.52                       | 82.98                       | 85.29                       | 88.46                       | 92.73                       | 98.32                       |

Table S7: Excitation energies ( $\Delta E$  (eV)) and D-2PA cross-sections ( $\sigma^{D-2PA}$  (GM)) for the transitions to  $S_1$ ,  $S_2$ , and  $S_3$  in CPCM at the CAM-B3LYP/aug-cc-pVDZ level of theory.

| Dye          | State | MeOH       |                  | ClForm     |                  | DMSO       |                  |
|--------------|-------|------------|------------------|------------|------------------|------------|------------------|
|              |       | $\Delta E$ | $\sigma^{D-2PA}$ | $\Delta E$ | $\sigma^{D-2PA}$ | $\Delta E$ | $\sigma^{D-2PA}$ |
| Coumarin     | $S_1$ | 4.35       | 2.42             | 4.33       | 2.49             | 4.33       | 2.98             |
|              | $S_2$ | 4.78       | 4.50             | 4.80       | 5.20             | 4.77       | 5.20             |
|              | $S_3$ | 5.80       | 13.20            | 5.09       | 0.003            | 5.19       | 0.003            |
| Coumarin 6   | $S_1$ | 3.09       | 94.15            | 3.10       | 95.62            | 3.05       | 108.31           |
|              | $S_2$ | 4.33       | 3.80             | 4.33       | 0.10             | 4.32       | 1.40             |
|              | $S_3$ | 4.46       | 141.70           | 4.42       | 95.20            | 4.45       | 358.60           |
| Coumarin 120 | $S_1$ | 3.98       | 29.22            | 4.00       | 30.55            | 3.95       | 34.53            |
|              | $S_2$ | 4.67       | 10.90            | 4.68       | 14.00            | 4.67       | 13.00            |
|              | $S_3$ | 5.22       | 0.80             | 5.22       | 1.10             | 5.20       | 0.90             |
| Coumarin 307 | $S_1$ | 3.49       | 64.93            | 3.53       | 71.72            | 3.46       | 75.55            |
|              | $S_2$ | 4.42       | 12.6             | 4.45       | 17.00            | 4.42       | 15.3             |
|              | $S_3$ | 4.91       | 1.90             | 4.93       | 2.00             | 4.90       | 2.40             |
| Coumarin 343 | $S_1$ | 3.27       | 67.73            | 3.27       | 81.90            | 3.23       | 80.42            |
|              | $S_2$ | 4.14       | 23.5             | 4.16       | 33.60            | 4.14       | 29.4             |
|              | $S_3$ | 4.72       | 1.90             | 4.71       | 1.10             | 4.71       | 2.60             |

Table S8: Two-photon absorption transition moments,  $\delta_{\omega}^{2\text{PA}}$  (in a.u.), calculated using quadratic response theory at different  $\omega$  values at the CAM-B3LYP/aug-cc-pVDZ level of theory in MeOH.

| $\omega$ (eV) | Coumarin | Coumarin 6 | Coumarin 120 | Coumarin 307 | Coumarin 343 |
|---------------|----------|------------|--------------|--------------|--------------|
| 1.6           | –        | 9157       | –            | –            | –            |
| 1.7           | –        | 9308       | –            | –            | 5889         |
| 1.8           | –        | 9618       | –            | 4950         | 5994         |
| 1.9           | –        | 10134      | –            | 5025         | 6189         |
| 2.0           | –        | 10889      | –            | 5178         | 6504         |
| 2.1           | –        | 11953      | –            | 5416         | 6954         |
| 2.2           | 119      | 13452      | 1750         | 5757         | 7582         |
| 2.3           | 119      | –          | 1800         | 6228         | 8448         |
| 2.4           | 121      | –          | 1873         | 6868         | –            |
| 2.5           | 125      | –          | 1972         | 7740         | –            |
| 2.6           | 129      | –          | 2105         | 8945         | –            |
| 2.7           | 136      | –          | 2277         | –            | –            |
| 2.8           | 144      | –          | 2503         | –            | –            |
| 2.9           | 155      | –          | 2801         | –            | –            |
| 3.0           | 168      | –          | 3197         | –            | –            |
| 3.1           | 186      | –          | –            | –            | –            |
| 3.2           | 208      | –          | –            | –            | –            |
| 3.3           | 238      | –          | –            | –            | –            |

Table S9: Two-photon absorption transition moments,  $\delta_{\omega}^{2\text{PA}}$  (in a.u.), calculated using quadratic response theory at different  $\omega$  values at the CAM-B3LYP/aug-cc-pVDZ level of theory in ClForm.

| $\omega$ (eV) | Coumarin | Coumarin 6 | Coumarin 120 | Coumarin 307 | Coumarin 343 |
|---------------|----------|------------|--------------|--------------|--------------|
| 1.6           | –        | 9236       | –            | –            | –            |
| 1.7           | –        | 9389       | –            | –            | 7091         |
| 1.8           | –        | 9707       | –            | 5331         | 7214         |
| 1.9           | –        | 10214      | –            | 5395         | 7453         |
| 2.0           | –        | 10958      | –            | 5538         | 7826         |
| 2.1           | –        | 12006      | 2059         | 5770         | 8362         |
| 2.2           | 124      | 13481      | 1804         | 6105         | 9109         |
| 2.3           | 125      | –          | 1854         | 6569         | 10139        |
| 2.4           | 127      | –          | 1926         | 7198         | –            |
| 2.5           | 131      | –          | 2026         | 8050         | –            |
| 2.6           | 136      | –          | 2157         | 9218         | –            |
| 2.7           | 143      | –          | 2330         | –            | –            |
| 2.8           | 152      | –          | 2554         | –            | –            |
| 2.9           | 163      | –          | 2849         | –            | –            |
| 3.0           | 178      | –          | 3241         | –            | –            |
| 3.1           | 197      | –          | –            | –            | –            |
| 3.2           | 222      | –          | –            | –            | –            |
| 3.3           | 255      | –          | –            | –            | –            |



Table S10: Two-photon absorption transition moments,  $\delta_{\omega}^{2PA}$  (in a.u.), and  $\theta$  ( $^{\circ}$ ) calculated using quadratic response theory at different  $\omega$  values at the CAM-B3LYP/aug-cc-pVDZ level of theory in DMSO.

| $\omega$ (eV)           | Coumarin | Coumarin 6 | Coumarin 120 | Coumarin 307 | Coumarin 343 |
|-------------------------|----------|------------|--------------|--------------|--------------|
| 1.6                     | –        | 10831      | –            | –            | –            |
| 1.7                     | –        | 11045      | –            | –            | 7184         |
| 1.8                     | –        | 11481      | –            | 5873         | 7339         |
| 1.9                     | –        | 12132      | –            | 5978         | 7609         |
| 2.0                     | –        | 13110      | –            | 6177         | 8034         |
| 2.1                     | –        | 14489      | 2065         | 6483         | 8638         |
| 2.2                     | 148      | 16443      | 2105         | 6919         | 9482         |
| 2.3                     | 149      | –          | 2171         | 7519         | 10651        |
| 2.4                     | 152      | –          | 2265         | 8336         | –            |
| 2.5                     | 156      | –          | 2393         | 9455         | –            |
| 2.6                     | 162      | –          | 2563         | 11012        | –            |
| 2.7                     | 170      | –          | 2786         | –            | –            |
| 2.8                     | 181      | –          | 3077         | –            | –            |
| 2.9                     | 195      | –          | 3463         | –            | –            |
| 3.0                     | 212      | –          | 3981         | –            | –            |
| 3.1                     | 235      | –          | –            | –            | –            |
| 3.2                     | 264      | –          | –            | –            | –            |
| 3.3                     | 304      | –          | –            | –            | –            |
| $\theta$ ( $^{\circ}$ ) | 21.60    | 170.62     | 17.76        | 9.75         | 168.03       |

Table S11: ND-2PA cross-sections of the 2-state model ( $\sigma_{\omega}^{\text{ND-2SM}}$ ), ratio of non-degenerate to degenerate photon energies (Enh.) and ND-2PA cross-sections ( $\sigma_{\omega}^{\text{ND-2PA}}$ ) computed using quadratic response of **coumarin** at the CAM-B3LYP/aug-cc-pVDZ level of theory in DMSO.

| $\omega$ (eV)                    | Coumarin                          |                                   |      |
|----------------------------------|-----------------------------------|-----------------------------------|------|
|                                  | $\sigma_{\omega}^{\text{ND-2SM}}$ | $\sigma_{\omega}^{\text{ND-2PA}}$ | Enh. |
| 2.17 <sup>a</sup>                | 4.80 <sup>a</sup>                 | 2.98 <sup>a</sup>                 | 1.00 |
| 2.2                              | 4.80                              | 2.99                              | 1.00 |
| 2.3                              | 4.80                              | 3.00                              | 1.00 |
| 2.4                              | 4.84                              | 3.03                              | 1.01 |
| 2.5                              | 4.90                              | 3.08                              | 1.02 |
| 2.6                              | 4.99                              | 3.14                              | 1.04 |
| 2.7                              | 5.14                              | 3.23                              | 1.07 |
| 2.8                              | 5.22                              | 3.34                              | 1.09 |
| 2.9                              | 5.42                              | 3.48                              | 1.13 |
| 3.0                              | 5.61                              | 3.65                              | 1.17 |
| 3.1                              | 5.90                              | 3.87                              | 1.23 |
| 3.2                              | 6.24                              | 4.13                              | 1.30 |
| 3.3                              | 6.63                              | 4.45                              | 1.38 |
| Relative change (%) <sup>b</sup> | 38.2                              | 49.5                              | 38.0 |

<sup>a</sup>D-2PA values,  $\sigma^{\text{D-2PA}}$  from Eq. 3 ( $N = 8$ ).

<sup>b</sup>Final  $\sigma^{\text{ND}}$  values relative to  $\sigma^{\text{D}}$ .

Table S12: ND-2PA cross-sections of the 2-state model ( $\sigma_{\omega}^{\text{ND-2SM}}$ ), ratio of non-degenerate to degenerate photon energies (Enh.) and ND-2PA cross-sections ( $\sigma_{\omega}^{\text{ND-2PA}}$ ) computed using quadratic response of **coumarin 120** at the CAM-B3LYP/aug-cc-pVDZ level of theory in DMSO.

| $\omega$ (eV)                    | Coumarin 120                      |                                   |      |
|----------------------------------|-----------------------------------|-----------------------------------|------|
|                                  | $\sigma_{\omega}^{\text{ND-2SM}}$ | $\sigma_{\omega}^{\text{ND-2PA}}$ | Enh. |
| 1.98 <sup>a</sup>                | 41.73 <sup>a</sup>                | 34.53 <sup>a</sup>                | 1.00 |
| 2.2                              | 42.14                             | 34.97                             | 1.01 |
| 2.3                              | 42.99                             | 35.55                             | 1.03 |
| 2.4                              | 43.81                             | 36.36                             | 1.05 |
| 2.5                              | 45.07                             | 37.44                             | 1.08 |
| 2.6                              | 46.32                             | 38.82                             | 1.11 |
| 2.7                              | 48.40                             | 40.57                             | 1.16 |
| 2.8                              | 50.50                             | 42.76                             | 1.21 |
| 2.9                              | 53.42                             | 45.51                             | 1.28 |
| 3.0                              | 57.17                             | 48.97                             | 1.37 |
| Relative change (%) <sup>b</sup> | 37.0                              | 42.0                              | 37.0 |

<sup>a</sup>D-2PA values,  $\sigma^{\text{D-2PA}}$  from Eq. 3 ( $N = 8$ ).

<sup>b</sup>Final  $\sigma^{\text{ND}}$  values relative to  $\sigma^{\text{D}}$ .

Table S13: ND-2PA cross-sections of the 2-state model ( $\sigma_{\omega}^{\text{ND-2SM}}$ ), ratio of non-degenerate to degenerate photon energies (Enh.) and ND-2PA cross-sections ( $\sigma_{\omega}^{\text{ND-2PA}}$ ) computed using quadratic response of **coumarin 307** at the CAM-B3LYP/aug-cc-pVDZ level of theory in DMSO.

| $\omega$ (eV)                    | Coumarin 307                      |                                   |      |
|----------------------------------|-----------------------------------|-----------------------------------|------|
|                                  | $\sigma_{\omega}^{\text{ND-2SM}}$ | $\sigma_{\omega}^{\text{ND-2PA}}$ | Enh. |
| 1.73 <sup>a</sup>                | 96.95 <sup>a</sup>                | 75.55 <sup>a</sup>                | 1.00 |
| 1.9                              | 97.93                             | 76.47                             | 1.01 |
| 2.0                              | 98.88                             | 77.84                             | 1.03 |
| 2.1                              | 101.81                            | 79.91                             | 1.06 |
| 2.2                              | 104.71                            | 82.77                             | 1.10 |
| 2.3                              | 108.58                            | 86.57                             | 1.15 |
| 2.4                              | 114.41                            | 91.52                             | 1.21 |
| 2.5                              | 121.20                            | 97.93                             | 1.25 |
| Relative change (%) <sup>b</sup> | 25.0                              | 29.6                              | 25.0 |

<sup>a</sup>D-2PA values,  $\sigma^{\text{D-2PA}}$  from Eq. 3 ( $N = 8$ ).

<sup>b</sup>Final  $\sigma^{\text{ND}}$  values relative to  $\sigma^{\text{D}}$ .

Table S14: ND-2PA cross-sections of the 2-state model ( $\sigma_{\omega}^{\text{ND-2SM}}$ ), ratio of non-degenerate to degenerate photon energies (Enh.) and ND-2PA cross-sections ( $\sigma_{\omega}^{\text{ND-2PA}}$ ) computed using quadratic response of **coumarin 343** at the CAM-B3LYP/aug-cc-pVDZ level of theory in DMSO.

| $\omega$ (eV)                    | Coumarin 343                      |                                   |      |
|----------------------------------|-----------------------------------|-----------------------------------|------|
|                                  | $\sigma_{\omega}^{\text{ND-2SM}}$ | $\sigma_{\omega}^{\text{ND-2PA}}$ | Enh. |
| 1.62 <sup>a</sup>                | 97.04 <sup>a</sup>                | 80.42 <sup>a</sup>                | 1.00 |
| 1.8                              | 98.01                             | 81.52                             | 1.01 |
| 1.9                              | 99.95                             | 82.98                             | 1.03 |
| 2.0                              | 102.87                            | 85.29                             | 1.06 |
| 2.1                              | 106.75                            | 88.46                             | 1.10 |
| 2.2                              | 111.59                            | 92.73                             | 1.15 |
| 2.3                              | 118.39                            | 98.32                             | 1.22 |
| Relative change (%) <sup>b</sup> | 22.0                              | 22.0                              | 22.0 |

<sup>a</sup>D-2PA values,  $\sigma^{\text{D-2PA}}$  from Eq. 3 ( $N = 8$ ).

<sup>b</sup>Final  $\sigma^{\text{ND}}$  values relative to  $\sigma^{\text{D}}$ .
